1 Prevalence and Factors Associated with Mental Illness Symptoms among  
2 School Students Post Lockdown of the COVID-19 Pandemic in the United Arab  
3 Emirates: A Cross-Sectional National Study

4  
5  
6 Nariman Ali Ghader<sup>1</sup>, Noor Al Mheiri<sup>1</sup>, Asma Fikri<sup>2</sup>, Hira AbdulRazzak<sup>3</sup>, Hassan Saleheen<sup>4</sup>, Basema Saddik<sup>5</sup>,  
7 Yousef Aljawarneh<sup>6</sup>, Heyam Dalky<sup>6</sup>, Ammar Al Banna<sup>7</sup>, Shammah Al Memari<sup>3</sup>, Budoor Al Shehhi<sup>3</sup>, Shereena  
8 Al Mazrouei<sup>3</sup>, Omniyat Al Hajeri<sup>3</sup>

9  
10 <sup>1</sup> Mental Health Department, Emirates Health Services, Dubai, United Arab Emirates

11 <sup>2</sup> National Center for Health Research, Ministry of Health and Prevention, Dubai, United Arab Emirates

12 <sup>3</sup> Statistics and Research Center, Ministry of Health and Prevention, Dubai, United Arab Emirates

13 <sup>4</sup> Abu Dhabi Public Health Center, Department of Health, Abu Dhabi, United Arab Emirates

14 <sup>5</sup> Department of Family and Community Medicine, University of Sharjah, Sharjah, United Arab Emirates

15 <sup>6</sup> Faculty of Health Sciences, Higher Colleges of Technology, Dubai, United Arab Emirates

16 <sup>7</sup> Child and Adolescent Mental Health Center of Excellence, Al Jalila Children's Specialty Hospital, Dubai,  
17 United Arab Emirates

18  
19 \* Corresponding author: Nariman Ali Ghader

20 Email: [nariman.ghader@ehs.gov.ae](mailto:nariman.ghader@ehs.gov.ae) (NAG)

## 21 Abstract

22 Data from the United Arab Emirates about the mental health status of the younger population is  
23 limited. The current study aimed to assess the prevalence of anxiety, depression, and risk for PTSD among  
24 school students post lockdown of the current COVID-19 pandemic. A sample of 3745 students and their  
25 parents across the country answered a web-based survey. Parents provided bio-demographic data and  
26 students answered questions from the Mood and Feeling Questionnaire (MFQ-Child Self-report), Screen  
27 for Child Anxiety Related Disorders (SCARED-Child Version), and Children's Revised Impact of Event Scale  
28 (CRIES-8). Findings showed that the risk for PTSD was the most prevalent (40.6%), followed by symptoms  
29 of anxiety (23.3%), and depression (17.1%). For gender differences, symptoms of the three conditions  
30 were higher in female students by 6.9%. Moreover, symptoms of depression and anxiety were found to  
31 be higher among late adolescents. Further analysis revealed that having medical problems ( $\beta = 2.0, p <$   
32  $0.001$ ) and witnessing the death of a close family member due to COVID-19 ( $\beta = 1.7, p < 0.001$ ) were  
33 positive predictors associated with PTSD, depression, and anxiety. The study concluded that post COVID-  
34 19 lockdown, symptoms of anxiety, depression, and risk for PTSD are prevalent among students in the  
35 UAE. Researchers recommend the initiation of a national school mental health screening program and the  
36 provision of follow-up services for vulnerable students. Another must-have is the integration of a mental  
37 health support system in the emergency and disaster preparedness future plans.

## 38 Introduction

39 Since the COVID-19 pandemic emerged, people and governments have been overwhelmed by the  
40 sudden rise in widespread mortality, morbidity, and disruption of everyday routines. Mental health has  
41 been considered a pivotal area of concern over the course of this particular period and the World Health  
42 Organization (WHO) affirmed that 90% of countries experienced substantial disruptions to basic

43 healthcare services and a notable increase in demand for mental health services. Globally, the prevalence  
44 of depression, stress, and anxiety among the general population during the COVID-19 pandemic is  
45 estimated to be 33.7%, 29.6%, and 31.9% respectively [1]. The growing threat of contracting the infection,  
46 the tragic stories of suffering and death, the imposed restrictions and policies (social isolation, lockdowns,  
47 vaccinations, etc...), the mania for information in the media, and the economic consequences have  
48 created a worldwide climate of depression and anxiety. Studies have revealed an increased risk of post-  
49 traumatic stress disorder (PTSD), sleep disorders, and cognitive underperformance in comparison to the  
50 pre-pandemic period [2].

51 Conventionally, children and young people are at the heart of global development. However, in a  
52 press release by UNICEF in October 2021, it was affirmed that the younger generation has been carrying  
53 the burden of mental health conditions even prior to COVID-19. Globally, one in seven adolescents aged  
54 10-19 years is estimated to suffer from a mental disorder according to the State of the World's Children  
55 2021 report. Undeniably, the complexity of this state has been accentuated by the aggressions of the  
56 pandemic. Additionally, the report warned that children and young people may experience the impact of  
57 COVID-19 on their mental health and well-being for many years to come [3]. Further evidence showed  
58 that COVID-19 and its related consequences have had a significant impact on youth and their psychological  
59 well-being. Uncertainties associated with the pandemic itself, such as prolonged and widespread parental  
60 stressors, school closures, and loss of loved ones have been detrimental to the well-being of adolescents  
61 and children [4].

62 Information about the impact of COVID-19 on the mental health of the United Arab Emirates  
63 (UAE) population is limited [5]. In an earlier study about the consequences of the pandemic on the  
64 psychological well-being of university students, it was revealed that more than 50% of students reported  
65 anxiety levels that ranged from mild to severe with females reporting higher levels of anxiety (OR=2.02,  
66 95% CI, 1.41 to 2.91) [6]. Another study conducted in the UAE explored the psychosocial correlates

67 (mental health history, COVID-19 infection status, demographic variables, and living arrangements) with  
68 depression and anxiety in a community of adults. Results showed higher levels of anxiety and depression  
69 as compared to the pre-pandemic figures. Furthermore, statistically significant associations were found  
70 between depression and anxiety on one hand, and being young, female, having a history of mental health  
71 problems, and having oneself or loved ones tested positive for COVID-19 on the other [7].

72 Indisputably, studies on the mental health of the UAE's younger population are essential as 17-  
73 22% of the nation's youth suffer from depressive symptoms [8]. Expectedly, the emergence of COVID-19  
74 has exacerbated this state of disturbance. It has been acknowledged that during the pandemic, children  
75 in the UAE were facing increased mental health issues associated with stories of calamities, home  
76 confinement, and fear of contracting the virus. Furthermore, this global crisis was found to have affected  
77 negatively children's mental, behavioral, physical, sleep, and dietary health in the UAE [9, 10].

78 This national study, which was carried out by a consortium of government health entities and  
79 academia within the UAE, aimed at establishing a robust data reference on the prevalence of mental  
80 illness symptoms among the younger population. The findings, which can be attributed to the current  
81 pandemic, will serve as scientific evidence on the magnitude and nature of work needed in children and  
82 adolescent mental health. Furthermore, this study will guide strategists and policymakers in the  
83 development of emergency and disaster preparedness plans and provide a clearer path for accurate  
84 future foresight.

## 85 **Objective**

86 This study aimed to investigate the prevalence of mental illness symptoms (depression, anxiety,  
87 and PTSD) among school students in the UAE post lockdown of the COVID-19 pandemic. It was  
88 hypothesized that mental illness symptoms are highly prevalent among school students in the UAE which  
89 could be exacerbated by the current outbreak.

## 90 Method

91 In this exploratory cross-sectional study, all students in the UAE private and government schools  
92 from grades 2 to 12, aged between 8 and 18 years, and believed to be capable of reading and  
93 understanding adequately written Arabic and/or English texts were invited to take in this study. However,  
94 students who were enrolled in vocational, continuing education, or special education programs/ schools  
95 were excluded. Equally well, parents of the surveyed students participated in the study by consenting on  
96 behalf of their under-age children and answering a series of questions within the same instrument.

### 97 Data collection procedure

98 Invites for participation were sent out to the public via multiple corporate channels including SMS,  
99 press release, and social media platforms. In addition, school-parent communication channels served as  
100 a fundamental resource for reaching out to the study participants. Parents and their children were asked  
101 to complete an online questionnaire using the UAE government survey platform “mSurvey”. Data was  
102 collected after students passed through a period of lockdown, however, the majority (83.3%) were still  
103 enrolled in total online school learning. Responses were collected over a period of six months (February –  
104 July 2021).

105 Depending on the students’ reading and comprehension abilities, parents were instructed to help  
106 their children read and understand the questions while avoiding the interpretation of answers. In  
107 addition, if a household had two or more younger children, parents were advised to help each child  
108 complete the questionnaire separately.

109

## 110 The instrument

111 The data collection instrument used in this study was composed of three sections. Firstly, a  
112 detailed participant information sheet and an informed consent form were mandatory fields to be  
113 completed before participants had access to the anonymous questionnaire. Secondly, parents were asked  
114 to respond to 26 questions which included family sociodemographic data as well as information on the  
115 student's general health status, experience with COVID-19 infection, school learning, and mental health-  
116 related behaviors; the estimated time to complete this part was 15 minutes. Thirdly, students were also  
117 requested to answer over an estimated 30 minute-period a series of 8 questions that explored their  
118 feelings and their current mental health status. Data on students' mental health-related behaviors were  
119 collated via a collection of standardized scales. MFQ-Child self-report (13-items), SCARED-Child Version  
120 (41-items), and CRIES were used to screen children for current depressive symptomatology, anxiety-  
121 related disorders and a wide range of traumatic events respectively [11-14].

## 122 Privacy and Confidentiality

123 Data were collected anonymously and were confidentially stored in the Emirates Health Services  
124 database system. Investigators and statisticians who helped in data analysis were the only individuals  
125 authorized to access the data and only after signing a non-disclosure agreement form.

## 126 Ethical Considerations

127 Ethical approvals were acquired from the Emirates Institutional Review Board for COVID-19  
128 Research (Reference No. DOH/CVDC/2020/2471) and the Research Ethics Committee at the Emirates  
129 Health Services, Dubai (reference No. MOHAP/DXB-REC/ DDD/No.163 /2020). Moreover, anonymity,  
130 confidentiality, and voluntariness were preserved throughout the study. As is conventional in anonymous  
131 surveys, consent was in place before starting the survey. Parents represented their underage children in  
132 accepting participation in this study. Parents confirmed their consent by answering a mandatory question

133 prior to beginning the survey. Participants were informed they could stop completing the questionnaire  
134 or refrain from submitting their responses if they felt uncomfortable at any stage during completion.  
135 Participation in the study was voluntary. Participants had the full right to withdraw at any time without  
136 the need to justify their actions. There were no apparent risks that could result from participating in this  
137 study. However, due to the fact that some students could feel uncomfortable expressing their feelings, a  
138 portal for remote counseling services was communicated to all participants.

## 139 Data Analysis

140 Data were analyzed using IBM SPSS Statistics for Windows version 26 (IBM Corp., Armonk, N.Y.,  
141 USA). The number of submitted questionnaires was 3762. However, post-data cleaning, the number was  
142 reduced to 3745. Mean and standard deviation (SD) were calculated for continuous variables while  
143 proportions (%) and frequencies (n) were reported for categorical variables. A multivariate analysis was  
144 conducted to examine the associations between mental illness symptoms and related factors by using the  
145 Pearson's product-moment correlation coefficient test. Multiple linear regression analyses were  
146 performed to examine the effects of selected demographic and COVID-19 related factors on students'  
147 mental illness symptoms scores. A  $P$ -value  $< 0.05$  was considered statistically significant in all analyses.

## 148 Findings

149 The socio-demographic characteristics of participants are shown in Table 1. The majority of  
150 parents were married (94.2%), employed (81.4%), and expats (67.8%). Likewise, most respondents  
151 (93.5%) had none of their family members been previously diagnosed with a mental health-related  
152 problem or behavioral disorder. As for students, over one-third (34.3%) were pre-adolescents (<10 yrs.),  
153 37.5% belonged to the early adolescence age group (10-13 yrs.), 23.7% to middle adolescence (14-17 yrs.),

154 and 1.8% to late adolescence (18 yrs.). For gender, a little over half (50.6%) were male. Most of the  
155 students (81.6%) studied in private schools and attended school completely online (82.3%).

156 **Table 1: Socio-demographic characteristics of the sample (N=3,745)**

| <b>Variables</b>                                         | <b>Number (%)*</b> |
|----------------------------------------------------------|--------------------|
| <b>Person responding to this questionnaire</b>           |                    |
| Father                                                   | 1227 (32.8)        |
| Mother                                                   | 2120 (56.6)        |
| Both parents/ Legally Authorized Representative/Guardian | 398 (10.6)         |
| <b>Parents Marital status</b>                            |                    |
| Married                                                  | 3528 (94.2)        |
| Divorced                                                 | 125 (3.3)          |
| Separated                                                | 53 (1.4)           |
| Widowed                                                  | 39 (1.0)           |
| <b>Total number of people living in house at present</b> |                    |
| 2-4                                                      | 1442 (38.5)        |
| 5-7                                                      | 1719 (45.9)        |
| 8-10                                                     | 358 (9.6)          |
| More than 10                                             | 219 (5.8)          |
| <b>Nationality</b>                                       |                    |



|                                                                                            |             |
|--------------------------------------------------------------------------------------------|-------------|
| Emirati                                                                                    | 1201 (32.1) |
| Non-Emirati                                                                                | 2540 (67.8) |
| <b>Employment status (parents/guardian/legally authorized representatives)</b>             |             |
| Employed                                                                                   | 3051 (81.4) |
| Unemployed                                                                                 | 694 (18.5)  |
| <b>Family member diagnosed with a mental health-related problem or behavioral disorder</b> |             |
| Yes                                                                                        | 231 (6.2)   |
| No                                                                                         | 3503 (93.5) |
| <b>Age of student (years)</b>                                                              |             |
| Pre-adolescence (<10 years)                                                                | 1285 (34.3) |
| Early adolescence (10-13 years)                                                            | 1403 (37.5) |
| Middle adolescence (14-17 years)                                                           | 888 (23.7)  |
| Late adolescence (18 years)                                                                | 67(1.8)     |
| <b>Gender of student</b>                                                                   |             |
| Male                                                                                       | 1895 (50.6) |
| Female                                                                                     | 1800 (48.1) |
| <b>Student has any medical problems</b>                                                    |             |
| Yes                                                                                        | 259 (6.9)   |

No 3486 (93.1)

**Student being diagnosed with a mental health-related problem or behavioral disorder**

Yes 114 (3.0)

No 3631 (97.0)

**Student school category**

Private 3057 (81.6)

Governmental 517 (13.8)

Semi-governmental 137 (3.7)

**Student current method of school learning**

Completely online 3083 (82.3)

Hybrid (partly online) 520 (13.9)

Completely live at school 109 (2.9)

---

157 \* Percentages may not add up to 100 because of missing data

158 The epidemic-related data of the study sample showed that 14% had a close family member at  
159 the time tested positive for coronavirus, followed by 14% who indicated that a close family member was  
160 before or at the time sick/hospitalized because of the current coronavirus infection. However, only 5.8%  
161 reported that a close family member had died because of the coronavirus. A smaller percentage of  
162 students were declared to be testing positive for coronavirus at the time (3%) while 5.4% were sick or  
163 hospitalized (Table 2).

164

165 **Table 2: Epidemic related information for the sample (N=3,745)**

| <b>Variables</b>                                                                                             | <b>Number (%)</b> |
|--------------------------------------------------------------------------------------------------------------|-------------------|
| <b>A close family member has currently tested positive for coronavirus</b>                                   |                   |
| True                                                                                                         | 532 (14.2)        |
| False                                                                                                        | 2998 (80.1)       |
| Not sure                                                                                                     | 215 (5.7)         |
| <b>A close family member is/got sick or is/was hospitalized because of the current coronavirus infection</b> |                   |
| True                                                                                                         | 525 (14.0)        |
| False                                                                                                        | 3072 (82.0)       |
| Not sure                                                                                                     | 148 (4.0)         |
| <b>You work around people who might have the current coronavirus</b>                                         |                   |
| True                                                                                                         | 798 (21.3)        |
| False                                                                                                        | 2291 (61.2)       |
| Not sure                                                                                                     | 656 (17.5)        |
| <b>A close family member died because of the current coronavirus</b>                                         |                   |
| True                                                                                                         | 216 (5.8)         |
| False                                                                                                        | 3367 (89.9)       |

Not sure 162 (4.3)

**Student is currently tested positive for coronavirus**

True 113 (3.0)

False 3516 (93.9)

Not sure 116 (3.1)

**Student is/got sick or is/was hospitalized because of the current coronavirus**

**pandemic**

True 203 (5.4)

False 3419 (91.3)

Not sure 123 (3.3)

---

166 The exploration of mental health symptoms indicated that the risk for PTSD was the most  
167 concerning issue (40.6%). Although anxiety and depression were found to be of lesser prevalence (23%  
168 and 17% respectively), they were still understood to be alarming.

169 Significant age and gender differences were found to be associated with mental health symptoms.  
170 A significantly higher proportion of participants who were late adolescents reported symptoms of two  
171 conditions (depression and anxiety) compared to participants in the younger age group ( $p < 0.05$ ).  
172 Additionally, a significantly higher proportion of female students reported symptoms of one condition-  
173 depression, anxiety, or risk for PTSD only- ( $p < 0.05$ ) or two conditions ( $p < 0.05$ ) (Table 3).

174

175

176 **Table 3: Distribution of symptoms by age and gender**

|                                   | Age of student (years)               |                                          |                                          |                                    | <i>p</i> -value | Gender of student |                 | <i>p</i> -value |
|-----------------------------------|--------------------------------------|------------------------------------------|------------------------------------------|------------------------------------|-----------------|-------------------|-----------------|-----------------|
|                                   | Pre-adolescence (<10 years) [n=1285] | Early adolescence (10-13 years) [n=1403] | Middle adolescence (14-17 years) [n=888] | Late adolescence (18 years) [n=67] |                 | Male [n=1895]     | Female [n=1800] |                 |
| <b>Symptoms of one condition</b>  |                                      |                                          |                                          |                                    |                 |                   |                 |                 |
| Depression only                   | 218 (17.0)                           | 246 (17.5)                               | 153 (17.2)                               | 18 (26.9)                          | .22             | 301 (15.9)        | 333 (18.5)      | <.05            |
| Anxiety only                      | 288 (22.4)                           | 328 (23.4)                               | 219 (24.7)                               | 16 (23.9)                          | .68             | 377 (19.9)        | 482 (26.8)      | <.01            |
| PTSD only                         | 499 (38.8)                           | 593 (42.3)                               | 371 (41.8)                               | 27 (40.3)                          | .30             | 730 (38.5)        | 765 (42.5)      | <.05            |
| <b>Symptoms of two conditions</b> |                                      |                                          |                                          |                                    |                 |                   |                 |                 |
| Depression and anxiety            | 125 (9.7)                            | 153 (10.9)                               | 114 (12.8)                               | 12 (17.9)                          | <.05            | 177 (9.3)         | 224 (12.4)      | <.01            |

|            |            |            |            |           |     |        |        |      |
|------------|------------|------------|------------|-----------|-----|--------|--------|------|
| Depression | 146 (11.4) | 184 (13.1) | 104 (11.7) | 11 (16.4) | .35 | 207    | 237    | <.05 |
| and PTSD   |            |            |            |           |     | (10.9) | (13.2) |      |
| Anxiety    | 198 (15.4) | 254 (18.1) | 151 (17.0) | 12 (17.9) | .31 | 279    | 340    | <.01 |
| and PTSD   |            |            |            |           |     | (14.7) | (18.9) |      |

**Symptoms of  
three  
conditions**

|                                     |          |           |          |          |     |           |           |     |
|-------------------------------------|----------|-----------|----------|----------|-----|-----------|-----------|-----|
| Depression,<br>anxiety, and<br>PTSD | 96 (7.5) | 130 (9.3) | 81 (9.1) | 8 (11.9) | .24 | 146 (7.7) | 166 (9.2) | .09 |
|-------------------------------------|----------|-----------|----------|----------|-----|-----------|-----------|-----|

---

177           A more detailed examination of the relationship between pandemic related factors and mental  
178 health symptoms is shown in Table 4. Students who were reported to have medical problems were more  
179 likely to have mental health symptoms as compared to those with nil history (p<0.01). Those who reported  
180 a close family member was sick or hospitalized because of the coronavirus infection were more likely to  
181 report mental health symptoms as compared to those who reported the statement was false (p<0.05). In  
182 terms of the death of a close family member due to coronavirus infection, respondents who reported a  
183 close family member had died because of the coronavirus infection were more likely to show mental  
184 health symptoms as compared to those who did not (p<0.01).

185

186

187

188 **Table 4: Prevalence of symptoms of depression, anxiety, PTSD stratified by epidemic-related factors**

|                                                          |        | Depression   |        |            | Anxiety      |        |            | PTSD         |        |            |
|----------------------------------------------------------|--------|--------------|--------|------------|--------------|--------|------------|--------------|--------|------------|
| Number                                                   |        | Present      | Absent | <i>p</i> - | Present      | Absent | <i>p</i> - | Present      | Absent | <i>p</i> - |
| (%)                                                      |        | <i>value</i> |        |            | <i>value</i> |        |            | <i>value</i> |        |            |
| <b>Student has any medical problems</b>                  |        |              |        |            |              |        |            |              |        |            |
| Yes                                                      | 259    | 68           | 191    | <.01       | 107          | 152    | <.01       | 131          | 128    | <.01       |
|                                                          | (6.9)  | (26.3)       | (73.7) |            | (41.3)       | (58.7) |            | (50.6)       | (49.4) |            |
| No                                                       | 3486   | 574          | 2912   |            | 764          | 2722   |            | 1388         | 2098   |            |
|                                                          | (93.1) | (16.5)       | (83.5) |            | (21.9)       | (78.1) |            | (39.8)       | (60.2) |            |
| <b>Student current method of school learning</b>         |        |              |        |            |              |        |            |              |        |            |
| Completely online                                        | 3083   | 511          | 2572   | <.05       | 734          | 2349   | .10        | 1242         | 1841   | .63        |
|                                                          | (83.1) | (16.6)       | (83.4) |            | (23.8)       | (76.2) |            | (40.3)       | (59.7) |            |
| Hybrid (partly online)                                   | 520    | 98           | 422    |            | 102          | 418    |            | 221          | 299    |            |
|                                                          | (14.0) | (18.8)       | (81.2) |            | (19.6)       | (80.4) |            | (42.5)       | (57.5) |            |
| Completely live at school                                | 109    | 28           | 81     |            | 27           | 82     |            | 44           | 65     |            |
|                                                          | (2.9)  | (25.7)       | (74.3) |            | (24.8)       | (75.2) |            | (40.4)       | (59.6) |            |
| <b>Student currently tested positive for coronavirus</b> |        |              |        |            |              |        |            |              |        |            |

|          |        |        |        |        |        |        |        |
|----------|--------|--------|--------|--------|--------|--------|--------|
| True     | 113    | 21     | 92     | 33     | 80     | 53     | 60     |
|          | (3.0)  | (18.6) | (81.4) | (29.2) | (70.8) | (46.9) | (53.1) |
|          |        |        |        | .66    |        | .08    | .38    |
| False    | 3516   | 598    | 2918   | 804    | 2712   | 1419   | 2097   |
|          | (93.9) | (17.0) | (83.0) | (22.9) | (77.1) | (40.4) | (59.6) |
| Not sure | 116    | 23     | 93     | 34     | 82     | 47     | 69     |
|          | (3.1)  | (19.8) | (80.2) | (29.3) | (70.7) | (40.5) | (59.5) |

**Student is/got sick or is/was hospitalized**

**because of the current coronavirus pandemic**

|          |        |        |        |        |        |        |        |
|----------|--------|--------|--------|--------|--------|--------|--------|
| True     | 203    | 46     | 157    | 60     | 143    | 99     | 104    |
|          | (5.4)  | (22.7) | (77.3) | (29.6) | (70.4) | (48.8) | (51.2) |
|          |        |        |        | .09    |        | <.05   | <.05   |
| False    | 3419   | 574    | 2845   | 775    | 2644   | 1373   | 2046   |
|          | (91.3) | (16.8) | (83.2) | (22.7) | (77.3) | (40.2) | (59.8) |
| Not sure | 123    | 22     | 101    | 36     | 87     | 47     | 76     |
|          | (3.3)  | (17.9) | (82.1) | (29.3) | (70.7) | (38.2) | (61.8) |

**A close family member is currently tested**

**positive for coronavirus**

|       |        |        |        |        |        |        |        |
|-------|--------|--------|--------|--------|--------|--------|--------|
| True  | 532    | 106    | 426    | 139    | 393    | 229    | 303    |
|       | (14.2) | (19.9) | (80.1) | (26.1) | (73.9) | (43.0) | (57.0) |
|       |        |        |        | .15    |        | <.05   | .45    |
| False | 2998   | 503    | 2495   | 668    | 2330   | 1204   | 1794   |
|       | (80.1) | (16.8) | (83.2) | (22.3) | (77.7) | (40.2) | (59.8) |



|          |       |        |        |        |        |        |        |
|----------|-------|--------|--------|--------|--------|--------|--------|
| Not sure | 215   | 33     | 182    | 64     | 151    | 86     | 129    |
|          | (5.7) | (15.3) | (84.7) | (29.8) | (70.2) | (40.0) | (60.0) |

**A close family member is/got sick or is/was**

**hospitalized because of the current coronavirus**

**infection**

|          |        |        |        |        |        |        |        |
|----------|--------|--------|--------|--------|--------|--------|--------|
| True     | 525    | 109    | 416    | 165    | 360    | 238    | 287    |
|          | (14.0) | (20.8) | (79.2) | (31.4) | (68.6) | (45.3) | (54.7) |
|          |        |        |        | <.05   |        | <.01   | <.05   |
| False    | 3072   | 512    | 2560   | 674    | 2398   | 1219   | 1853   |
|          | (82.0) | (16.7) | (83.3) | (21.9) | (78.1) | (39.7) | (60.3) |
| Not sure | 148    | 21     | 127    | 32     | 116    | 62     | 86     |
|          | (4.0)  | (14.2) | (85.8) | (21.6) | (78.4) | (41.9) | (58.1) |

**A close family member died because of the**

**current coronavirus**

|          |        |        |        |        |        |        |        |
|----------|--------|--------|--------|--------|--------|--------|--------|
| True     | 216    | 57     | 159    | 78     | 138    | 119    | 97     |
|          | (5.8)  | (26.4) | (73.6) | (36.1) | (63.9) | (55.1) | (44.9) |
|          |        |        |        | <.01   |        | <.01   | <.01   |
| False    | 3367   | 553    | 2814   | 740    | 2627   | 1326   | 2041   |
|          | (89.9) | (16.4) | (83.6) | (22.0) | (78.0) | (39.4) | (60.6) |
| Not sure | 162    | 32     | 130    | 53     | 109    | 74     | 88     |
|          | (4.3)  | (19.8) | (80.2) | (33.7) | (67.3) | (45.7) | (54.3) |

189 Further regression analysis identified the factors associated with depression, anxiety, and risk for  
 190 PTSD as shown in Table 5. Students who had any medical problems were 2.0 (95% CI 1.5-2.6) times more  
 191 likely to display anxiety symptoms, and 1.3 (95% CI 1.0-1.8) times more at risk for PTSD. Likewise,  
 192 participants who had experienced the death of a close family member due to coronavirus infection were  
 193 1.7 (95% CI 1.2-2.4) times more likely to report depression symptoms, 1.7 (95% CI 1.2-2.3) times more  
 194 likely to have higher levels of anxiety, and 1.7 (95% CI 1.2-2.3) times more at risk for PTSD after adjusting  
 195 for age, gender, and existing mental health-related problems.

196 **Table 5: Predisposing factors to common mental health symptoms**

|                                                   |       |             | Depression                   |        |         | Anxiety                      |                |                | PTSD                         |                |                |
|---------------------------------------------------|-------|-------------|------------------------------|--------|---------|------------------------------|----------------|----------------|------------------------------|----------------|----------------|
|                                                   |       |             | Odds Ratio (OR) <sup>a</sup> | 95% CI | p-value | Odds Ratio (OR) <sup>a</sup> | 95% CI         | p-value        | Odds Ratio (OR) <sup>a</sup> | 95% CI         | p-value        |
| <b>Student has any medical problems</b>           | No    | 3486 (93.1) | 1.0                          | Ref    |         | 1.0                          | Ref            |                | 1.0                          | Ref            |                |
|                                                   | Yes   | 259 (6.9)   | 1.2                          | .8-1.7 | .19     | <b>2.0</b>                   | <b>1.5-2.6</b> | <b>&lt;.01</b> | <b>1.3</b>                   | <b>1.0-1.8</b> | <b>&lt;.05</b> |
| <b>Student is/got sick or is/was hospitalized</b> | False | 3419 (91.3) | 1.0                          | Ref    |         | 1.0                          | Ref            |                | 1.0                          | Ref            |                |
|                                                   | True  | 203 (5.4)   | 1.3                          | .8-1.8 | .16     | 1.1                          | .7-1.5         | .54            | 1.1                          | .8-1.6         | .25            |

|                       |       |        |            |             |                |            |             |                |            |             |                |
|-----------------------|-------|--------|------------|-------------|----------------|------------|-------------|----------------|------------|-------------|----------------|
| <b>because of the</b> | Not   | 123    | 1.3        | .7-         | .24            | 1.3        | .8-         | .21            | .8         | .5-         | .35            |
| <b>current</b>        | sure  | (3.3)  |            | 2.4         |                |            | 2.2         |                |            | 1.2         |                |
| <b>coronavirus</b>    |       |        |            |             |                |            |             |                |            |             |                |
| <b>pandemic</b>       |       |        |            |             |                |            |             |                |            |             |                |
| <b>A close family</b> | False | 3072   | 1.0        | Ref         |                |            | Ref         |                | 1.0        | Ref         |                |
| <b>member is/got</b>  |       | (82.0) |            |             |                | 1.0        |             |                |            |             |                |
| <b>sick or is/was</b> | True  | 525    | 1.0        | .8-         | .63            | <b>1.3</b> | <b>1.0-</b> | <b>&lt;.05</b> | 1.0        | .8-         | .38            |
| <b>hospitalized</b>   |       | (14.0) |            | 1.3         |                |            | <b>1.6</b>  |                |            | 1.3         |                |
| <b>because of the</b> | Not   | 148    | .6         | .3-         | .11            | .6         | .4-         | .10            | 1.0        | .6-         | .99            |
| <b>current</b>        | sure  | (4.0)  |            | 1.1         |                |            | 1.0         |                |            | 1.4         |                |
| <b>coronavirus</b>    |       |        |            |             |                |            |             |                |            |             |                |
| <b>infection</b>      |       |        |            |             |                |            |             |                |            |             |                |
| <b>A close family</b> | False | 3367   | 1.0        | Ref         |                | 1.0        | Ref         |                | 1.0        | Ref         |                |
| <b>member died</b>    |       | (89.9) |            |             |                |            |             |                |            |             |                |
| <b>because of the</b> | True  | 216    | <b>1.7</b> | <b>1.2-</b> | <b>&lt;.01</b> | <b>1.7</b> | <b>1.2-</b> | <b>&lt;.01</b> | <b>1.7</b> | <b>1.2-</b> | <b>&lt;.01</b> |
| <b>current</b>        |       | (5.8)  |            | <b>2.4</b>  |                |            | <b>2.3</b>  |                |            | <b>2.3</b>  |                |
| <b>coronavirus</b>    | Not   | 162    | 1.2        | .7-         | .37            | <b>1.6</b> | <b>1.0-</b> | <b>&lt;.05</b> | 1.2        | .8-         | .23            |
|                       | sure  | (4.3)  |            | 2.0         |                |            | <b>2.4</b>  |                |            | 1.8         |                |

197 †Adjusted for age, gender, and the existence of mental health-related problems

## 198 Discussion

199 This cross-sectional web-based study investigated the prevalence of mental health symptoms  
200 (depression, anxiety, and risk for PTSD among 3745 school students in the United Arab Emirates post  
201 lockdown of the COVID-19 pandemic. This study also identified the potential factors that predicted school  
202 students' depression, anxiety, and risk for PTSD.

### 203 Prevalence of anxiety, depression, and risk for PTSD

204 This study has adequate evidence that students in the UAE are exhibiting symptoms of mental  
205 health disorders in the post COVID-19 pandemic period and this is consistent with that of recent studies  
206 across the globe. In a comprehensive review of evidence, the WHO concluded that the world has  
207 experienced a 25% increase in the prevalence of anxiety and depression in the first year of the COVID-19  
208 crisis. More precisely, the report revealed that the pandemic has particularly affected the mental health  
209 of young people who, more seriously, were found disproportionately at risk of suicidal and self-harming  
210 behaviors. Accordingly, the organization considered the COVID-19 pandemic a wake-up call to the world  
211 to set up mental health services [15-17]. Furthermore, a score of studies showed that adolescents were  
212 more under the weather during the pandemic compared to adults; these comparative results revealed  
213 that adolescents were more likely to report depression, anxiety, and PTSD [18, 19]. For the post-lockdown  
214 period, a study from China found out that PTSD symptoms were prevalent among a large-scale of  
215 adolescents in China (16.9%), followed by depression (12.8%), and anxiety (7.1%) [20].

216

### 217 Gender and age differences

218 The results from this study highlight that female and older adolescents showed a significantly  
219 higher proportion of anxiety, depression, and risk for PTSD symptoms. These gender and age related

220 differences are supported by a number of recent studies that showed female high school students at an  
221 increased risk of psychological stress [21] and at higher levels of anxiety and depressive symptoms during  
222 the pandemic [22]. Interestingly, a number of researchers have argued that a possible explanation for  
223 female high school students' higher levels of anxiety, depression, and stress symptoms during the COVID-  
224 19 pandemic could be due to physiologic hormonal and bodily changes or a lack of coping mechanisms  
225 [23, 24].

## 226 Past medical history and Family/social support

227 This study explored more associations between mental symptoms and existing medical  
228 conditions. Findings showed that students who had any medical problem were 2.0 (95% CI 1.5-2.6) times  
229 more likely to have anxiety, 1.3 (95% CI 1.0-1.8) times more likely to have PTSD. These results are  
230 supported by a recent post-lockdown study conducted in Germany which showed that children with  
231 complex chronic diseases were more likely to have mental health problems [25]. In another supportive  
232 study, researchers concluded that COVID-19-associated mental health risks were more likely to appear in  
233 children and adolescents with special needs [26]. Conventionally, social ties and family relationships are  
234 understood to have a significant impact on the maintenance of psychological well-being and reduce the  
235 risk for depression among adolescents [27-30]. The relevant findings from our study are supportive of this  
236 conviction; participants who reported that a close family member had tested positive for SARS-CoV-2, got  
237 ill, or was hospitalized due to the infection were more likely to have mental health disorders as compared  
238 to those who did not. Furthermore, participants who had experienced the death of a close family member  
239 due to coronavirus infection were 1.7 (95% CI 1.2-2.4) times more likely to have depression, 1.7 (95% CI  
240 1.2-2.3) times more likely to have anxiety, and 1.7 (95% CI 1.2-2.3) times more likely to have PTSD.

241 In a nutshell, symptoms of anxiety, depression, and risk for PTSD were found in the UAE school  
242 students. Mental health services are needed to help those children cope and recover as the Covid-19

243 pandemic is receding. Special attention must be regarded to disadvantaged children and proactive plans  
244 should be put in place for potentially forthcoming threats.

## 245 Strengths and Limitations

246 Healthcare entities in the UAE have been leveraging their resources to address robustly the  
247 mental health of children and adolescents even before the COVID-19 pandemic. However, the emergence  
248 of this global threat required nationwide collaboration to address the exigencies of the situation. Scientific  
249 mental health research in the UAE before the COVID-19 era was normally conducted at institutional level.  
250 As part of the national response to disaster management, mental health research in children and  
251 adolescents have been prioritized. A multi-disciplinary team from diverse government health regulators,  
252 the emergency and disaster management research team, healthcare service-providers (public and private  
253 sectors), and academia in the UAE collaborated to develop a solid ground of national data on the status  
254 of mental illness symptoms in the younger population. And what's more, the data collection instrument  
255 was a mere innovative piece which garnered data on eight different scales (sociodemographic, COVID-19,  
256 prosocial behavior-SDQ, psychosocial Impact-PIS, mood and feelings-MFQ, child anxiety-SCARED,  
257 impact of events-CRIES, loneliness-UCLA-LS). A pilot test was run to ensure the validity and reliability  
258 of the hybrid tool and adjustments were made accordingly. The strong collaboration that EHS steered led  
259 to cultivating the inputs from parents and school students from the seven emirates (N=3762). In addition,  
260 the large sample size maximized the statistical significance, as well as minimized the statistic's margin of  
261 error. Eventually, robust data sets were generated which would serve multiple disciplines connected to  
262 children and adolescents' health (physical and mental health, educational, social, and economical). One  
263 more proven strength of this study comes from the literature review which revealed that such work is the  
264 first of its kind in the UAE and its findings shall serve as scientific evidence on the magnitude and nature  
265 of work needed in children and adolescents' mental health. Conversely, the main limitation of this work  
266 comes from the extraordinary abundance of data variables which made it impossible for researchers to

267 incorporate them all in a single study. This shortcoming can be rectified by calling upon researchers to  
268 derive from this data bank a series of other relevant studies that would inform the community of mental  
269 health professionals, decision makers, and policy developers in their intent to promote the well-being and  
270 overall mental health of children and adolescents. A second logistic limitation comes from the limited pre-  
271 pandemic data on the status of children and adolescents mental health in the UAE which gave little chance  
272 to explore a causal relationship. Finally, the data was collected using self-reported measures without any  
273 clinical encounters.

## 274 Conclusion

275 Lockdown, social restrictions, school closures, fear, sickness, death, and all the COVID-19  
276 pandemic mood have placed significant mental health pressures on school students and their families  
277 across worldwide. Our findings highlight the prevalent mental symptoms faced by school students in the  
278 UAE post lockdown of the current COVID-19 pandemic. Moreover, the findings extend the current  
279 understanding of the underlying factors that contribute to the development of anxiety, depression, and  
280 PTSD among school students. The current study primarily highlights the particular importance of  
281 identifying school students who are at high risk of mental health disorders. Likewise, it provides  
282 information for family, school administrators, and policymakers to work jointly for a sustainable and  
283 socially supportive environment that maintains and promotes the well-being and overall mental health of  
284 school students with particular considerations to emergencies and disasters preparedness.

285 The results from this study provide significant guidance for the development of psychological  
286 support strategies for school students. Particular attention should be paid to groups at higher risks (late  
287 adolescents, female students, and those living within disturbed family relationships and suffering from  
288 complex chronic diseases). In addition, students who suffered a traumatic experience during the  
289 pandemic such as becoming critically ill, losing a loved one, or being hospitalized over an extended period  
290 of time should receive additional attention. There is a need to continuously evaluate the mental wellness

291 of students, to take specific measures to help students cope with the evolving learning environment, to  
292 identify the psychological needs of students instantly and at an individual level, to provide psychological  
293 interventions for students suffering from psychological distress, to train teachers to understand the verbal  
294 and non-verbal cues of students that tell about potential mental sufferings, and to solidify  
295 communications between school and family. On a broader spectrum, this study calls upon healthcare and  
296 non-healthcare entities, policy-makers, and the civil society that invest in shaping the future to develop a  
297 comprehensive school mental health program that promotes the well-being of youth and strengthens the  
298 resilience of these minors in the face of the forthcoming uncertainties and threats.

## 299 Acknowledgements

300 We thank Dr. Aji Gopakumar, Dr. Mariam Jaafar, and Ms. Amna AlDhmanie from the Data and  
301 Statistics Department –Emirates Health Services Establishment for assisting in publishing this research.  
302 Likewise, we acknowledge Ms. Ahlam Al Maskari for assisting in data collection at Abu Dhabi Public Health  
303 Center and the research team at the Statistics and Research Center-Ministry of Health and Prevention.

## 304 References

- 305 1. Salari N, Hosseini-Far A, Jalali R *et al.* Prevalence of stress, anxiety, depression among the general  
306 population during the COVID-19 pandemic: A systematic review and meta-analysis. *Glob. Health*  
307 2020;16(1). <https://doi.org/10.1186/s12992-020-00589-w>.
- 308 2. Ornell F, Schuch JB, Sordi AO, *et al.* Pandemic fear and covid-19: Mental health burden and strategies.  
309 *Brazilian Journal of Psychiatry* 2020;42(3):232–235. <https://doi.org/10.1590/1516-4446-2020-0008>.
- 310 3. UNICEF. *Impact of covid-19 on poor mental health in children and young people 'tip of the iceberg'*.  
311 UNICEF 2021. Retrieved May 19, 2022. Available from: [https://www.unicef.org/press-](https://www.unicef.org/press-releases/impact-covid-19-poor-mental-health-children-and-young-people-tip-iceberg)  
312 [releases/impact-covid-19-poor-mental-health-children-and-young-people-tip-iceberg](https://www.unicef.org/press-releases/impact-covid-19-poor-mental-health-children-and-young-people-tip-iceberg)



- 313 4. Dalton L, Rapa E, & Stein A (2020). Protecting the psychological health of children through effective  
314 communication about COVID-19. *The Lancet. Child & adolescent health*. 2020;4(5):346–347.  
315 [https://doi.org/10.1016/s2352-4642\(20\)30097-3](https://doi.org/10.1016/s2352-4642(20)30097-3)
- 316 5. Saddik B, Hussein A, Albanna A. The psychological impact of the COVID-19 pandemic on adults and  
317 children in the United Arab Emirates: a nationwide cross-sectional study. *BMC psychiatry*  
318 2021;21(1):224. <https://doi.org/10.1186/s12888-021-03213-2>
- 319 6. Saddik B, Hussein A, Sharif-Askari FS *et al*. Increased levels of anxiety among medical and non-medical  
320 university students during the COVID-19 pandemic in the United Arab Emirates. *Risk Manag. Healthc.*  
321 *Policy* 2020;13:2395–2406. Available from: <https://doi.org/10.2147/rmhp.s273333>
- 322 7. Thomas J, Barbato M, Verlinden M, *et al*. Psychosocial correlates of depression and anxiety in the  
323 United Arab Emirates during the COVID-19 pandemic. *Front Psychiatry* 2020;11:564172. Retrieved  
324 April 26, 2022. Available from: <https://www.ncbi.nlm.nih.gov/pmc/articles/PMC7683430/>
- 325 8. Gaafar R, Moonesar IA, Chung N *et al*. Promoting Children's & Adolescents Mental Health in the United  
326 Arab Emirates in the 21st Century. *International Health Policies* 2021. Retrieved May 18, 2022.  
327 Available from: [https://www.internationalhealthpolicies.org/featured-article/promoting-childrens-  
328 adolescents-mental-health-in-the-united-arab-emirates-in-the-21st-century/](https://www.internationalhealthpolicies.org/featured-article/promoting-childrens-adolescents-mental-health-in-the-united-arab-emirates-in-the-21st-century/)
- 329 9. Zakzak L, & Shibl E. Are the Children OK? The Impact of COVID-19 Pandemic on UAE Children’s Mental  
330 Health - Policy Analysis and Recommendations. Mohammed Bin Rashid School Of Government POLICY  
331 BRIEF 2020. Retrieved May 18, 2022, Available from: [https://www.mbrsg.ae/home/research/health-  
332 policy/the-impact-on-covid-19-pandemic-on-uae-children-s](https://www.mbrsg.ae/home/research/health-policy/the-impact-on-covid-19-pandemic-on-uae-children-s)
- 333 10. Hassan S, Saviour M, Perkar S, *et al*. The impacts of home confinement due to coronavirus (COVID-19)  
334 on children: A Cross Sectional Survey study, Mediclinic City Hospital, Dubai, UAE. *Am. J. Pediatr.*  
335 2020;6(4):408. Available from: <https://doi.org/10.11648/j.ajp.20200604.14>

- 336 11. Angold A, Costello EJ, Messer SC, *et al.* Development of a short questionnaire for use in  
337 epidemiological studies of depression in children and adolescents. *Int J Methods Psychiatr Res*  
338 1995;5(4):237–249.
- 339 12. Monga S, Birmaher B, Chiappetta L, *et al.* Screen for child anxiety-related emotional disorders  
340 (scared): Convergent and divergent validity. *Depression and Anxiety* 2000;12(2):85–91. Available  
341 from: [https://doi.org/10.1002/1520-6394\(2000\)12:2<85::aid-da4>3.0.co;2-2](https://doi.org/10.1002/1520-6394(2000)12:2<85::aid-da4>3.0.co;2-2)
- 342 13. Birmaher B, Khetarpal S, Brent D, *et al.* The screen for child anxiety related emotional disorders  
343 (scared): Scale construction and psychometric characteristics. *J Am Acad Child Adolesc Psychiatry*  
344 1997;36(4):545–553. Available from: <https://doi.org/10.1097/00004583-199704000-00018>
- 345 14. Perrin S, Meiser-Stedman R, Smith P. The children's revised impact of event scale (CRIES): Validity as  
346 a screening instrument for PTSD. *Behav Cogn Psychother*;2005;33(4):487–498. Available  
347 from: <https://doi.org/10.1017/S1352465805002419>
- 348 15. World Health Organization. *Covid-19 pandemic triggers 25% increase in prevalence of anxiety and*  
349 *depression worldwide*. World Health Organization 2022. Retrieved May 23, 2022. Available from:  
350 [https://www.who.int/news/item/02-03-2022-covid-19-pandemic-triggers-25-increase-in-](https://www.who.int/news/item/02-03-2022-covid-19-pandemic-triggers-25-increase-in-prevalence-of-anxiety-and-depression-worldwide)  
351 [prevalence-of-anxiety-and-depression-worldwide](https://www.who.int/news/item/02-03-2022-covid-19-pandemic-triggers-25-increase-in-prevalence-of-anxiety-and-depression-worldwide)
- 352 16. World Health Organization. *Covid-19 continues to disrupt essential health services in 90% of countries*.  
353 World Health Organization 2021. Retrieved April 27, 2022. Available from:  
354 [https://www.who.int/news/item/23-04-2021-covid-19-continues-to-disrupt-essential-health-](https://www.who.int/news/item/23-04-2021-covid-19-continues-to-disrupt-essential-health-services-in-90-of-countries)  
355 [services-in-90-of-countries](https://www.who.int/news/item/23-04-2021-covid-19-continues-to-disrupt-essential-health-services-in-90-of-countries)
- 356 17. World Health Organization. *Second round of the National Pulse Survey on continuity of essential health*  
357 *services during the COVID-19 pandemic*. World Health Organization 2021. Retrieved April 27, 2022.  
358 Available from: [https://www.who.int/publications/i/item/WHO-2019-nCoV-EHS-continuity-survey-](https://www.who.int/publications/i/item/WHO-2019-nCoV-EHS-continuity-survey-2021.1)  
359 [2021.1](https://www.who.int/publications/i/item/WHO-2019-nCoV-EHS-continuity-survey-2021.1)

- 360 18. Zhang C, Ye M, Fu Y, *et al.* The Psychological Impact of the COVID-19 Pandemic on Teenagers in China. *J*  
361 *Adolesc Health: official publication of the Society for Adolescent Medicine* 2020;67(6):747–755.  
362 Available from: <https://doi.org/10.1016/j.jadohealth.2020.08.026>
- 363 19. Murata S, Rezeppa T, Thoma B, *et al.* The psychiatric sequelae of the COVID-19 pandemic in  
364 adolescents, adults, and health care workers. *Depression and Anxiety* 2021;38(2):233–246. Available  
365 from: <https://doi.org/10.1002/da.23120>
- 366 20. Cao C, Wang L, Fang R, *et al.* Anxiety, depression, and PTSD symptoms among high school students in  
367 China in response to the COVID-19 pandemic and lockdown. *J. Affect. Disord.* 2022;296:126–129.  
368 Available from: <https://doi.org/10.1016/j.jad.2021.09.052>
- 369 21. Qin Z, Shi L, Xue Y, *et al.* Prevalence and risk factors associated with self-reported psychological  
370 distress among children and adolescents during the COVID-19 pandemic in China. *JAMA Netw. Open*  
371 2021;4(1). Available from: <https://doi.org/10.1001/jamanetworkopen.2020.35487>
- 372 22. Zhou S-J, Zhang L-G, Wang L-L, *et al.* Prevalence and socio-demographic correlates of psychological  
373 health problems in Chinese adolescents during the outbreak of covid-19. *Eur Child Adolesc Psychiatry*  
374 2020;29(6):749–758. Available from: <https://doi.org/10.1007/s00787-020-01541-4>
- 375 23. Bebbington P. The origins of sex differences in depressive disorder: Bridging the gap. *Int Rev Psychiatry*  
376 1996;8(4):295–332. Available from: <https://doi.org/10.3109/09540269609051547>
- 377 24. Kessler RC. Lifetime and 12-month prevalence of DSM-III-R psychiatric disorders in the United  
378 States. *Arch Gen Psychiatry* 1994;51(1):8. Available from:  
379 <https://doi.org/10.1001/archpsyc.1994.03950010008002>
- 380 25. Geweniger A, Barth M, Haddad AD, *et al.* Impact of the COVID-19 pandemic on mental health  
381 outcomes of healthy children, children with special health care needs and their caregivers—results of  
382 a cross-sectional study. *Front Pediatr* 2022;10. Available from:  
383 <https://doi.org/10.3389/fped.2022.759066>

- 384 26. Fegert JM, Vitiello B, Plener PL, *et al.* Challenges and burden of the coronavirus 2019 (COVID-19)  
385 pandemic for Child and adolescent mental health: A narrative review to highlight clinical and research  
386 needs in the acute phase and the long return to normality. *Child Adolesc. Psychiatry Ment. Health*  
387 2020;14(1). Available from: <https://doi.org/10.1186/s13034-020-00329-3>
- 388 27. Kawachi I, & Berkman L. Social Ties and Mental Health. *J Urban Health: Bulletin of the New York*  
389 *Academy of Medicine* 2001;78(3):458–467. Available from: <https://doi.org/10.1093/jurban/78.3.458>
- 390 28. Khan A, & Husain A. Social support as a moderator of positive psychological strengths and subjective  
391 well-being. *Psychological Reports* 2010;106(2):534–538. Available from:  
392 <https://doi.org/10.2466/pr0.106.2.534-538>
- 393 29. Eisman AB, Stoddard SA., Heinze J, *et al.* Depressive symptoms, social support, and violence exposure  
394 among urban youth: A longitudinal study of resilience. *Dev. Psychol.* 2015;51(9):1307–1316. Available  
395 from: <https://doi.org/10.1037/a0039501>
- 396 30. Li F, Luo S, Mu W, *et al.* Effects of sources of social support and resilience on the mental health of  
397 different age groups during the COVID-19 pandemic. *BMC Psychiatry* 2021;21(1). Available from:  
398 <https://doi.org/10.1186/s12888-020-03012-1>
